# Supplementary material for: Distribution and risk assessment of antibiotic resistance genes in swine farm wastewater and its surrounding environments: from soil to water
Source: Royal Society of Chemistry journal article supplement (doi:10.1039/d4em00687a), 2025-01-01
Supplement: d4em00687a1.pdf [file d4em00687a1.pdf]

## Distribution and risk assessment of antibiotic resistance genes of swine farm wastewater and surrounding environments: from soil to water

Haiyue Ma<sup>1</sup>, Jinping Du<sup>1</sup>, Ting Xu<sup>1,2</sup>, Daqiang Yin<sup>1,2</sup>, Xiaoling Fang<sup>3</sup>, Xueping Guo<sup>1,2\*</sup>

<sup>1</sup>Key Laboratory of Yangtze River Water Environment, Ministry of Education, College of Environmental Science and Engineering, Tongji University, Shanghai 200092, China

<sup>2</sup>Shanghai Institute of Pollution Control and Ecological Security, Shanghai 200092, China

<sup>3</sup>Shanghai Eye Diseases Prevention & Treatment Center/ Shanghai Eye Hospital, School of Medicine, Tongji University, Shanghai 200331, China.

\*Corresponding author: Key Laboratory of Yangtze River Water Environment, Ministry of Education, College of Environmental Science and Engineering, Tongji University, Shanghai 200092, China.

\* Corresponding author: Xueping Guo. College of Environmental Science and Engineering, Tongji University, No. 1239 Siping Road, Shanghai, 200092, China

E-mail: [xuepingg@tongji.edu.cn](mailto:xuepingg@tongji.edu.cn)

This file contains: Table S1-S4 with the attached table and Figure S1-6.

The detailed information wastewater treatment processes is as followed.

Initially, pig urine and cleaning wastewater were collected centrally into a sewage ditch and then directed into a manure collection tank via piping. The wastewater in the manure collection tank was then diverted: one portion enters an anaerobic tower (800 m<sup>3</sup>) for fermentation, while the other undergoes solid-liquid separation. The separated solid manure residue was stored alongside fresh manure in a manure composting shed, where it was mixed with wood chips or straw and subjected to high-temperature composting (at 65-70 °C), air-drying, grinding, and screening to produce organic fertilizer. The liquid portion after solid-liquid separation was also diverted, with one stream entering an anaerobic storage pond for continued fermentation, and the other entering a biochemical regulation tank, where it converged with the effluent from solid-liquid separation, the effluent from the anaerobic tower, and the biogas slurry from the anaerobic storage tank. The biochemical system primarily treated the biogas slurry, and the treated tail-water was partially used directly for farmland irrigation, while the remaining portion was returned to the anaerobic storage pond for mixing and subsequent reuse.

**Table S1. Information on samples**

| <b>Sample Time</b> | <b>Sample Location</b>                       | <b>Sample Types</b> | <b>Sample Name</b> |
|--------------------|----------------------------------------------|---------------------|--------------------|
| March, 2021        | swine farm                                   | biogas slurry       | BS1                |
|                    | agricultural land                            | soil                | ES                 |
|                    | agricultural land                            | control soil        | CS                 |
| August, 2021       | swine farm                                   | biogas slurry       | BS2                |
|                    | river                                        | surface water       | SW                 |
|                    | well about 100 m away<br>from the swine farm | groundwater         | GW1                |
|                    | well about 800 m away<br>from the swine farm | groundwater         | GW2                |
|                    |                                              |                     |                    |

Each sample has biological replicates.

**Table S2. Information on the 47 target genes with 100% detection frequencies**

| <b>Gene name</b>    | <b>class</b>   | <b>mechanism</b> |
|---------------------|----------------|------------------|
| <i>int1-a-marko</i> | Integrase      |                  |
| <i>sul1</i>         | Sulfonamide    | protection       |
| <i>int11</i>        | Integrase      |                  |
| <i>qacEΔ1</i>       | MDR            | efflux           |
| IS6100              | Insertional    |                  |
| <i>oprJ</i>         | MDR            | efflux           |
| <i>qacEΔ1</i>       | MDR            | efflux           |
| <i>disul</i>        | Sulfonamide    | protection       |
| <i>int13</i>        | Integrase      |                  |
| <i>tetG</i>         | Tetracycline   | efflux           |
| <i>rpoB</i>         | housekeeping   |                  |
| IS26                | Insertional    |                  |
| <i>tetX</i>         | Tetracycline   | deactivate       |
| <i>aadA17</i>       | Aminoglycoside | deactivate       |
| <i>ermF</i>         | MLSB           | protection       |
| <i>aadA2</i>        | Aminoglycoside | deactivate       |
| <i>cefa_qacelta</i> | MDR            | unknown          |
| <i>tetG</i>         | Tetracycline   | efflux           |
| <i>aac(6')-Ib</i>   | Aminoglycoside | deactivate       |
| <i>cmlA1</i>        | Phenicol       | efflux           |
| <i>tetM</i>         | Tetracycline   | protection       |
| <i>aadA5</i>        | Aminoglycoside | deactivate       |
| <i>floR</i>         | Amphenicol     | efflux           |
| <i>repA</i>         | Plasmid -ep    |                  |
| <i>cmlA1</i>        | Amphenicol     | efflux           |
| <i>strB</i>         | Aminoglycoside | protection       |
| ISSm2               | Insertional    |                  |
| <i>erm(42)</i>      | MLSB           | protection       |
| <i>dfra14</i>       | Trimethoprim   | protection       |
| <i>pica</i>         | MLSB           | protection       |
| <i>tnpA</i>         | Transposase    |                  |
| <i>aph(3'')-ia</i>  | Aminoglycoside | deactivate       |
| <i>lnu(F)</i>       | MLSB           | deactivate       |
| <i>dfra1</i>        | Trimethoprim   | protection       |
| <i>tetR</i>         | Tetracycline   | regulator        |
| <i>dfra17</i>       | Trimethoprim   | protection       |
| <i>aac(3)</i>       | Aminoglycoside | deactivate       |
| <i>aac(6')-II</i>   | Aminoglycoside | deactivate       |
| <i>erm(O)</i>       | MLSB           | protection       |
| <i>aphA1</i>        | Aminoglycoside | deactivate       |
| IS613               | Transposase    |                  |
| <i>blaOXA</i>       | Beta Lactam    | deactivate       |
| <i>ereA</i>         | MLSB           | deactivate       |
| <i>qacH</i>         | MDR            | efflux           |
| <i>dfra1</i>        | Trimethoprim   | deactivate       |
| <i>tetA</i>         | Tetracycline   | efflux           |
| <i>tetR</i>         | Tetracycline   | unknown          |

**Table S3. The Pearson correlation between the most abundant MGE and ARGs**

| <b>Genes</b>  | <b>IS6100</b>        |          |
|---------------|----------------------|----------|
|               | <b>R<sup>2</sup></b> | <b>P</b> |
| <i>tetG</i>   | 0.98771              | ***      |
| <i>sulI</i>   | 0.99801              | ***      |
| <i>ermF</i>   | 0.99384              | ***      |
| <i>qacEΔ1</i> | 0.99662              | ***      |
| <i>floR</i>   | 0.97061              | ***      |

**Table S4. Information on high-risk ARGs**

| <b>Gene</b>       | <b>ARGs type</b> | <b>Relative Abundance</b> | <b>movability</b> | <b>Correlation with MGEs</b> | <b>Host Pathogenicity</b>              |
|-------------------|------------------|---------------------------|-------------------|------------------------------|----------------------------------------|
| <i>sulI</i>       | Sulfonamide      | $1.31 \times 10^{-1}$     | Yes               | Yes                          | Acinetobacter baumannii<br>Brandenburg |
| <i>oprJ</i>       | MDR              | $8.51 \times 10^{-2}$     | Yes               | Yes                          | Pseudomonas aeruginosa                 |
| <i>tetX</i>       | Tetracycline     | $4.27 \times 10^{-2}$     | Yes               | Yes                          | Bacteroides                            |
| <i>aadA17</i>     | Aminoglycoside   | $3.46 \times 10^{-2}$     | Yes               | Yes                          | Acinetobacter baumannii                |
| <i>ermF</i>       | MLSB             | $3.46 \times 10^{-2}$     | Yes               | Yes                          | Riemerella anatipestifer               |
| <i>aadA2</i>      | Aminoglycoside   | $2.14 \times 10^{-2}$     | Yes               | Yes                          | Acinetobacter<br>baumanniig            |
| <i>tetG</i>       | Tetracycline     | $1.97 \times 10^{-2}$     | Yes               | Yes                          | Pseudomonas aeruginosa                 |
| <i>aac(6')-Ib</i> | Aminoglycoside   | $1.92 \times 10^{-2}$     | Yes               | Yes                          | Mycobacteroides<br>abscessus           |
| <i>tetM</i>       | Tetracycline     | $1.20 \times 10^{-2}$     | Yes               | Yes                          | Salmonella enterica                    |

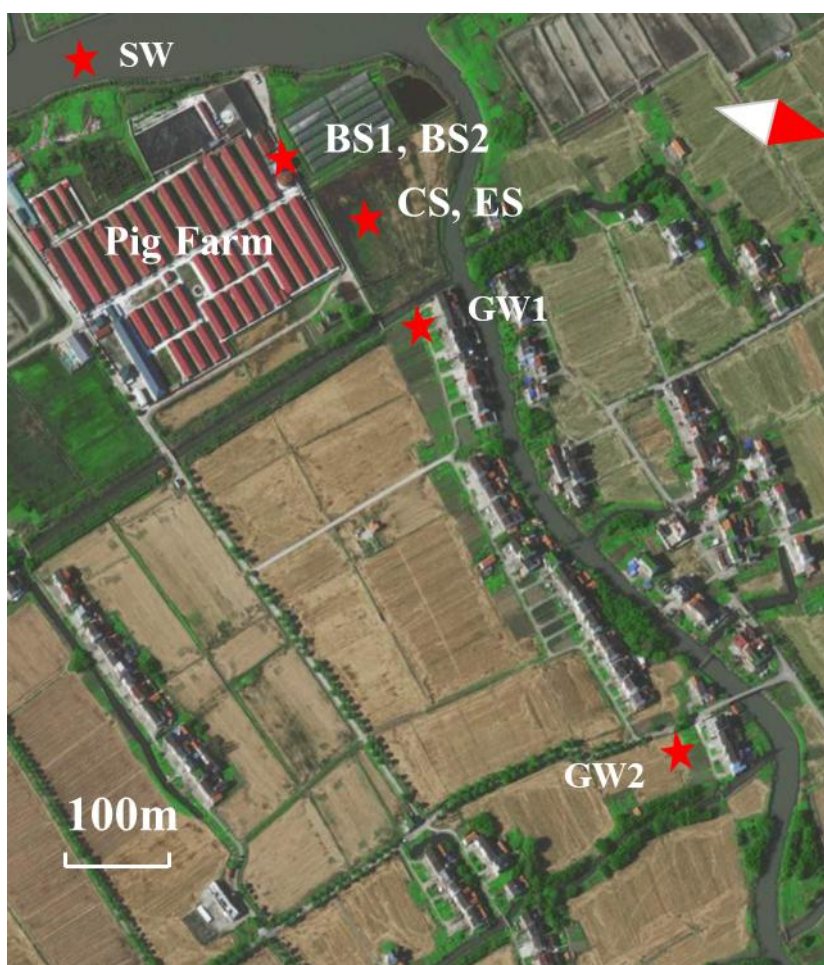

**Fig. S1.** The sampling sites in Jinshan district, Shanghai. BS1, BS2, CS, ES, SW, GW1, and GW2 represent the biogas slurry of the swine farm in March 2021, the biogas slurry of the swine farm in August 2021, the agricultural soils not irrigated with biogas slurry, the agricultural soils after 4 days of irrigating with biogas, surface water from the river north of the swine farm, and groundwater about 100 m and 800 m away from the swine farm, respectively.

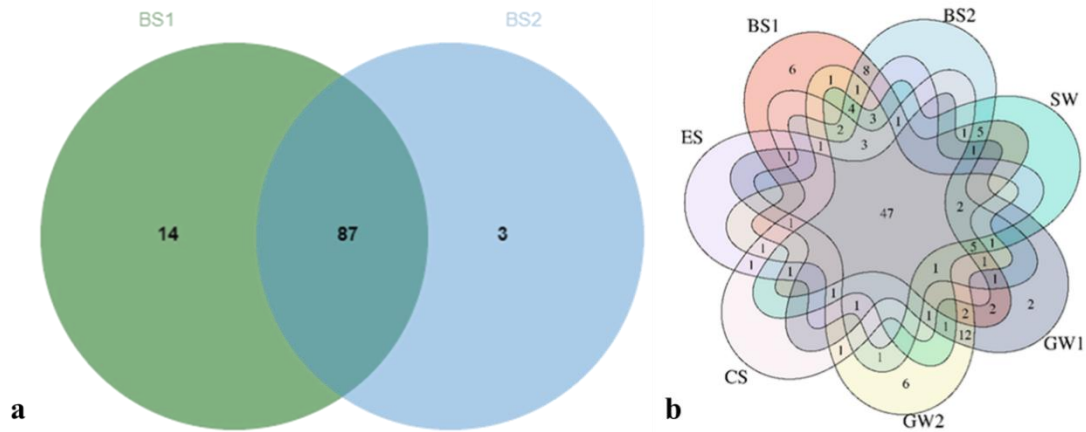

**Fig. S2. Different Venn diagram analysis with BS1 and BS2 (a), BS1, BS2, CS, ES, SW, GW1, and GW2 (b) of 216 target genes.** BS1, BS2, CS, ES, SW, GW1, and GW2 represent the biogas slurry of the swine farm in March 2021, the biogas slurry of the swine farm in August 2021, the agricultural soils not irrigated with biogas slurry, the agricultural soils after 4 days of irrigating with biogas, surface water from the river north of the swine farm, and groundwater about 100 m and 800 m away from the swine farm, respectively. Venn diagram analysis was plotted by <https://www.bioinformatics.com.cn> (last accessed on 20 Feb 2024), an online platform for data analysis and visualization.



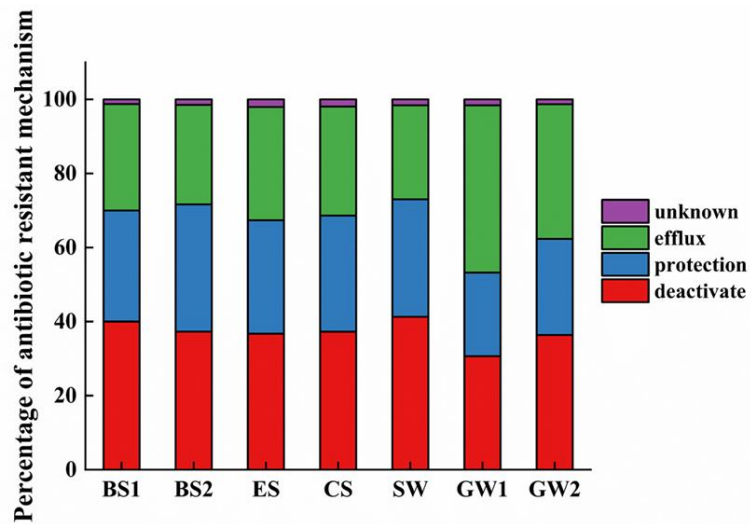

**Fig. S3. Types of ARGs subtypes with different resistance mechanisms.** BS1, BS2, CS, ES, SW, GW1 and GW2 represent the biogas slurry of the swine farm in March 2021, the biogas slurry of the swine farm in August 2021, the agricultural soils not irrigated with biogas slurry, the agricultural soils after 4 days of irrigating with biogas, surface water from the river north of the swine farm, and groundwater about 100 m and 800 m away from the swine farm, respectively.

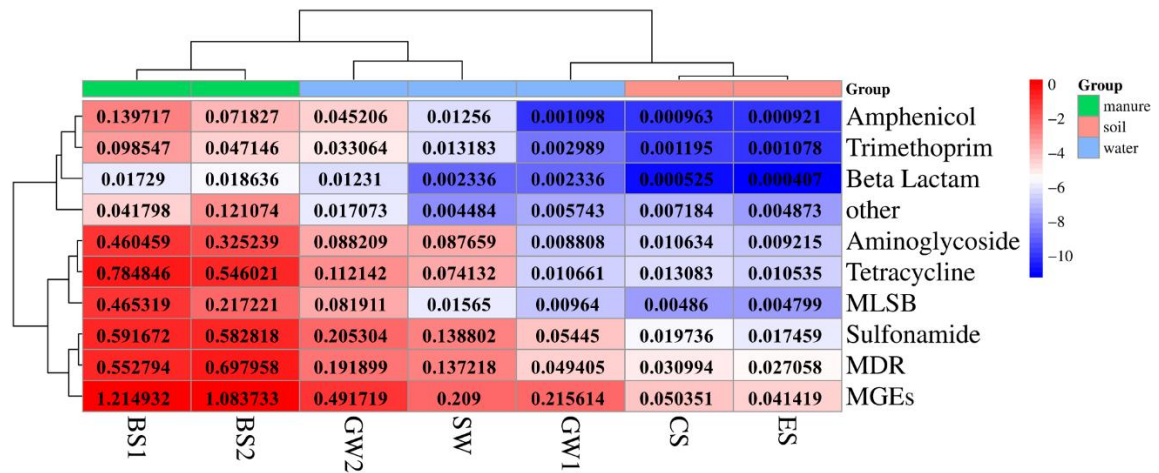

**Fig. S4. The total relative abundance of various types of ARGs and MGEs in different samples.** BS1, BS2, CS, ES, SW, GW1, and GW2 represent the biogas slurry of the swine farm in March 2021, the biogas slurry of the swine farm in August 2021, the agricultural soils not irrigated with biogas slurry, the agricultural soils after 4 days of irrigating with biogas, surface water from the river north of the swine farm, and groundwater about 100 m and 800 m away from the swine farm, respectively. The above relative abundances have been taken as  $\log_2$ . Heatmap was plotted by <https://www.bioinformatics.com.cn> (last accessed on 20 Feb 2024), an online platform for data analysis and visualization.

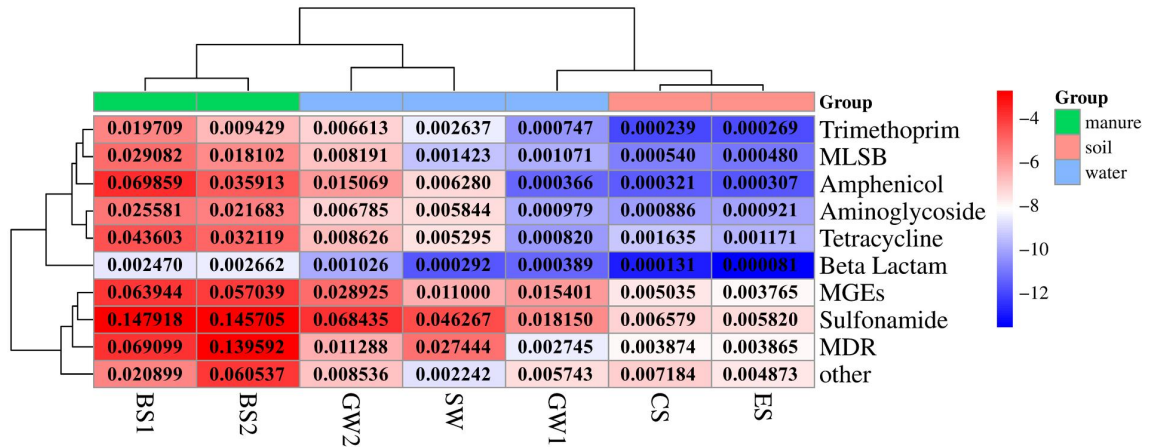

**Fig. S5. The average relative abundance of various types of ARGs in different samples.** BS1, BS2, CS, ES, SW, GW1, and GW2 represent the biogas slurry of the swine farm in March 2021, the biogas slurry of the swine farm in August 2021, the agricultural soils not irrigated with biogas slurry, the agricultural soils after 4 days of irrigating with biogas, surface water from the river north of the swine farm, and groundwater about 100 m and 800 m away from the swine farm, respectively. The above relative abundances have been taken as log2. Heatmap was plotted by <https://www.bioinformatics.com.cn> (last accessed on 20 Feb 2024), an online platform for data analysis and visualization.

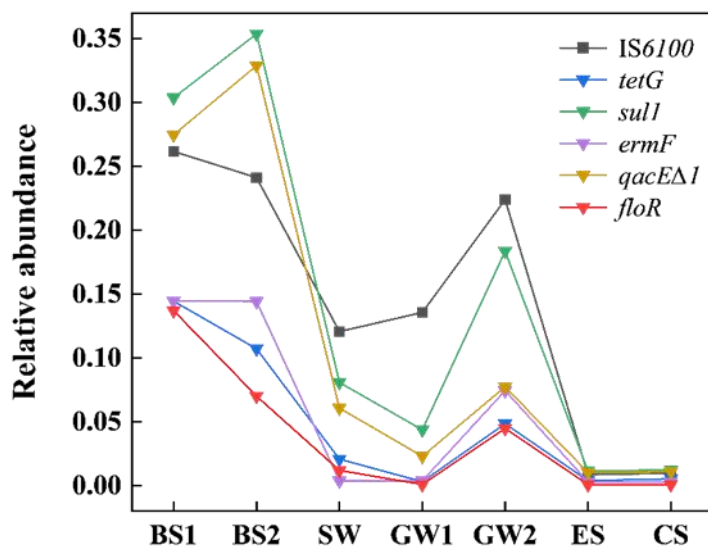

**Fig. S6. The relative abundance of the most abundant MGE and ARGs in different samples.** BS1, BS2, CS, ES, SW, GW1, and GW2 represent the biogas slurry of the swine farm in March 2021, the biogas slurry of the swine farm in August 2021, the agricultural soils not irrigated with biogas slurry, the agricultural soils after 4 days of irrigating with biogas, surface water from the river north of the swine farm, and groundwater about 100 m and 800 m away from the swine farm, respectively.
